# Supplementary material
Source: PubMed Central journal article supplement (PMC3676454)

# Supplementary Figure 1

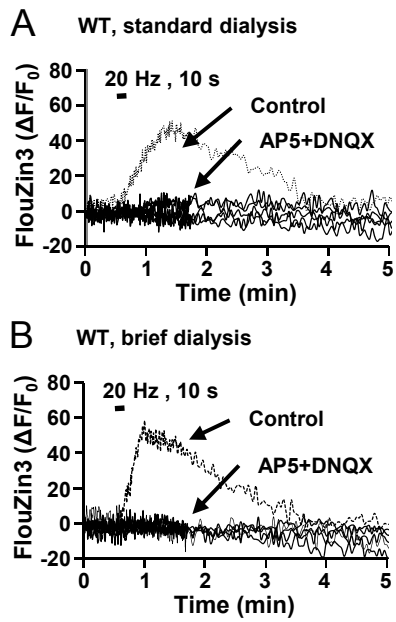

Supplement: NIHMS460157-supplement-Supp_Fig_S1.pdf [file NIHMS460157-supplement-Supp_Fig_S1.pdf]
